# Supplementary material for: The transport history of African biomass burning aerosols arriving in the remote Southeast Atlantic marine boundary layer and their impacts on cloud properties
Source: Copernicus journal article supplement (doi:10.5194/egusphere-2024-3975), 2025-01-08
Supplement: Supplementary file 1 [file egusphere-2024-3975-supplement.pdf]

# **The transport history of African biomass burning aerosols arriving in the remote Southeast Atlantic marine boundary layer and their impacts on cloud properties**

5 Huihui Wu<sup>1</sup>, Fanny Peers<sup>2,a</sup>, Jonathan W Taylor<sup>1,b</sup>, Chenjie Yu<sup>1,c</sup>, Steven J Abel<sup>3</sup>, Paul A. Barrett<sup>3</sup>, Jamie Trembath<sup>4</sup>, Keith Bower<sup>1</sup>, Jim M. Haywood<sup>2,3</sup> and Hugh Coe<sup>1</sup>

<sup>1</sup>Department of Earth and Environmental Sciences, University of Manchester, Manchester, UK

<sup>2</sup>College of Mathematics, Engineering and Physical Science, University of Exeter, UK

<sup>3</sup>Met Office, Fitzroy Road, Exeter, EX1 3PB, UK

<sup>4</sup>Facility for Airborne Atmospheric Measurements (FAAM), FAAM, Cranfield, UK

10

<sup>a</sup>Now at: Laboratoire d'Optique Atmosphérique, Université de Lille, Villeneuve-d'Ascq, France

<sup>b</sup>Now at: Research IT, University of Manchester, Manchester, UK

<sup>c</sup>Now at: Université Paris Cité and Univ Paris Est Créteil, CNRS, LISA, F-75013 Paris, France

15 *Correspondence to:* Hugh Coe (hugh.coe@manchester.ac.uk)

Supplementary

**Table S1. CLARIFY aircraft flights used in this study.**

| Flight | Date       | Take-off time | Duration (hours) | Pollution layer (MBL/FT) | In-cloud data (min) | MBL structure |
|--------|------------|---------------|------------------|--------------------------|---------------------|---------------|
| C029   | 17/08/2017 | 08:56         | 3:23             | MBL                      | 5:38                | e             |
| C031   | 18/08/2017 | 11:59         | 3:43             | MBL                      | 4:00                | d             |
| C032   | 19/08/2017 | 10:01         | 3:43             | MBL                      | 33:24               | f             |
| C033   | 22/08/2017 | 08:54         | 3:45             | FT                       | 7:44                | e             |
| C036   | 24/08/2017 | 09:03         | 3:02             | FT                       | 23:40               | e             |
| C037   | 24/08/2017 | 13:46         | 3:07             | FT                       | 1:58                | e             |
| C038   | 25/08/2017 | 09:00         | 3:49             | MBL&FT                   | 14: 24              | e             |
| C039   | 25/08/2017 | 14:17         | 3:06             | FT                       | 7: 43               | d             |
| C042   | 28/08/2017 | 08:55         | 3:28             | MBL&FT                   | 14: 18              | e             |
| C044   | 29/08/2017 | 08:54         | 3:50             | MBL&FT                   | 36: 34              | e             |
| C045   | 29/08/2017 | 14:10         | 3:06             | MBL&FT                   | 33:12               | e             |
| C046   | 30/08/2017 | 08:45         | 4:06             | MBL&FT                   | 11:46               | d             |
| C047   | 01/09/2017 | 08:56         | 2:50             | MBL&FT                   | 2:21                | d             |
| C048   | 01/09/2017 | 13:26         | 3:57             | MBL&FT                   | 26:02               | e             |
| C049   | 02/09/2017 | 08:56         | 3:43             | MBL&FT                   | 11:11               | d             |
| C050   | 04/09/2017 | 13:28         | 3:46             | MBL&FT                   | 29:47               | e             |
| C051   | 05/09/2017 | 08:58         | 3:14             | MBL&FT                   | 38:41               | d             |

Note: 1) “d” represents a decoupled stratocumulus MBL. 2) “e” represents a stratocumulus-over-cumulus MBL. 3) “f” represents a cumulus-capped MBL.

20

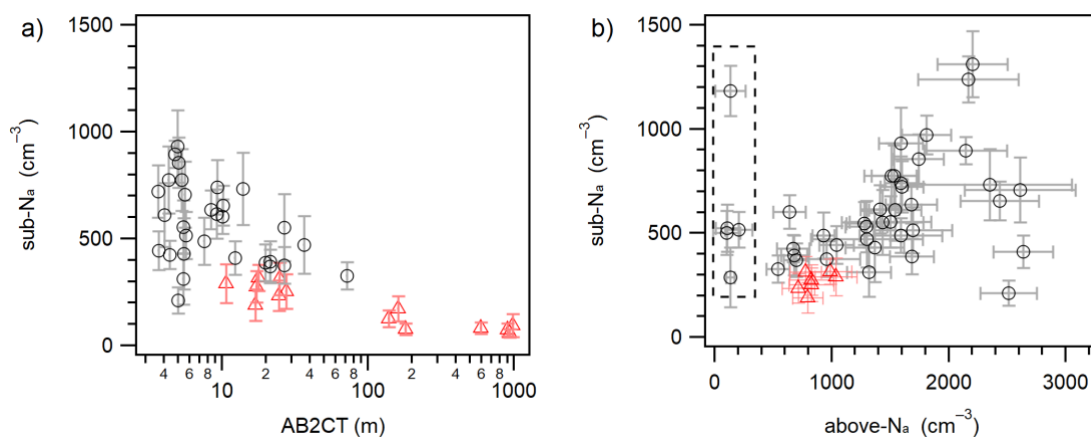

**Figure S1: Relationships a) between sub-N<sub>a</sub> and the distance between the bottom of the FT BB layer and cloud top (Aerosol Base to Cloud Top, AB2CT); b) between sub-N<sub>a</sub> and above-N<sub>a</sub>. The markers and error bars represent the average values and standard deviation for each profile. Black represents the BB-impacted MBL, and red represents the clean MBL.**

25

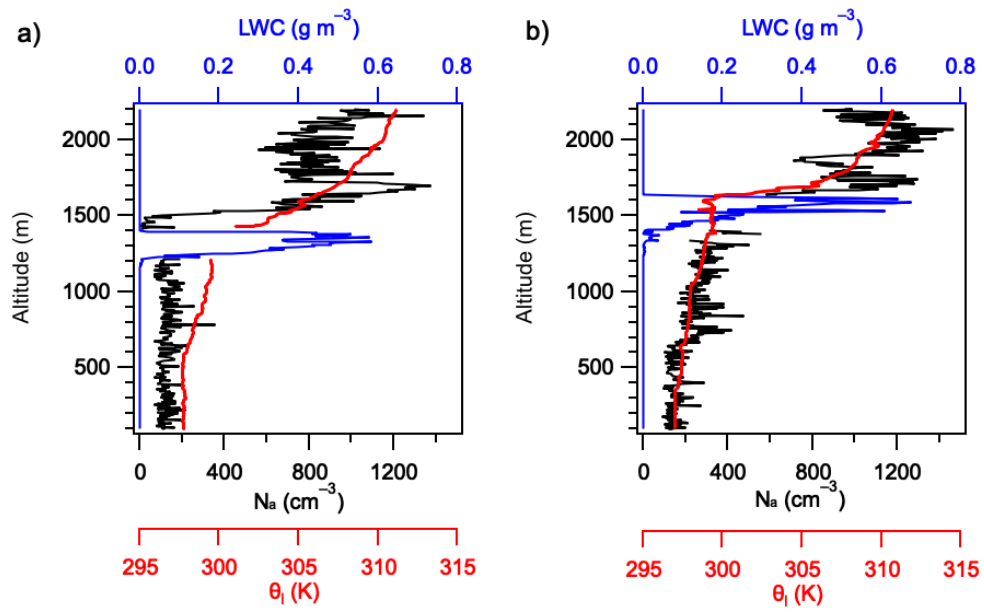

Figure S2: Vertical structures of  $N_a$ , LWC, and  $\theta_1$  in example (a) separate and (b) contact profiles within the clean MBL.

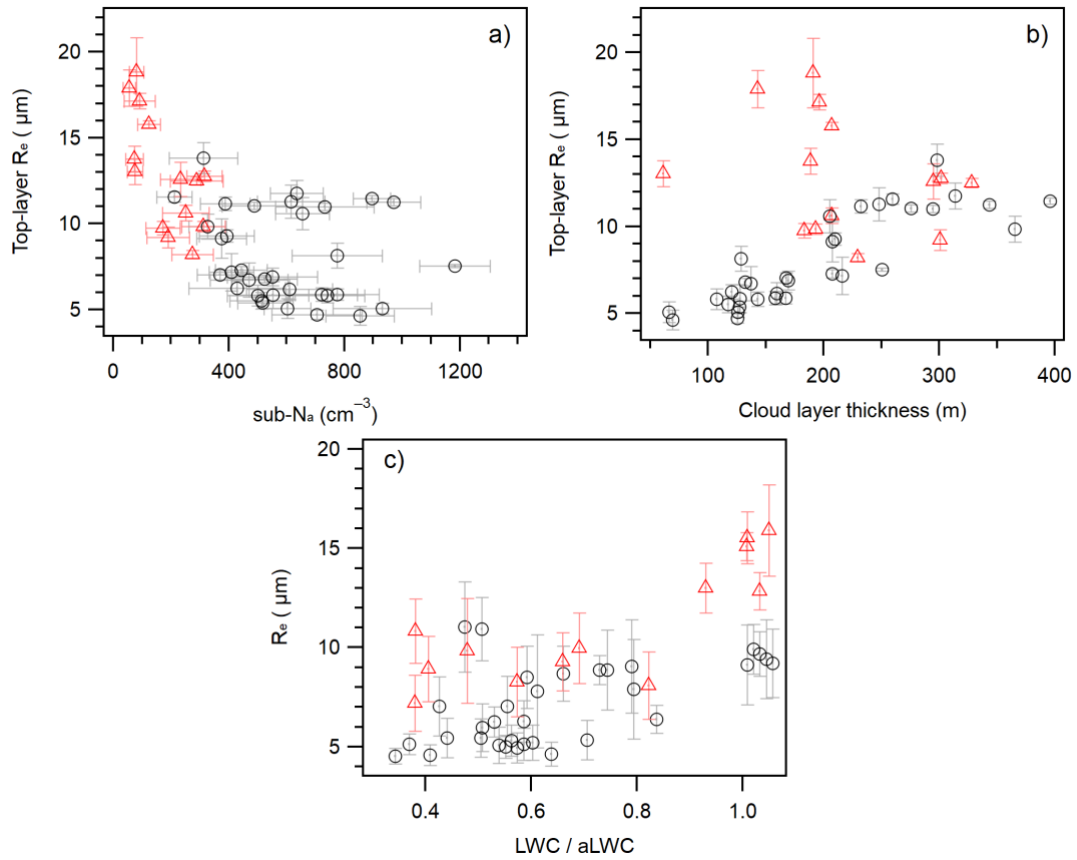

30

**Figure S3: a) Relationship between cloud-top-layer  $R_e$  and sub- $N_a$  for all analyzed profiles. b) Relationship between cloud-top-layer  $R_e$  and cloud layer depth for all analyzed profiles. c) Relationship between cloud-layer mean  $R_e$  and the average ratio of LWC/aLWC for all analyzed profiles. The markers and error bars represent the average values and standard deviation for each profile. Black represents the BB-impacted MBL, and red represents the clean MBL.**

35

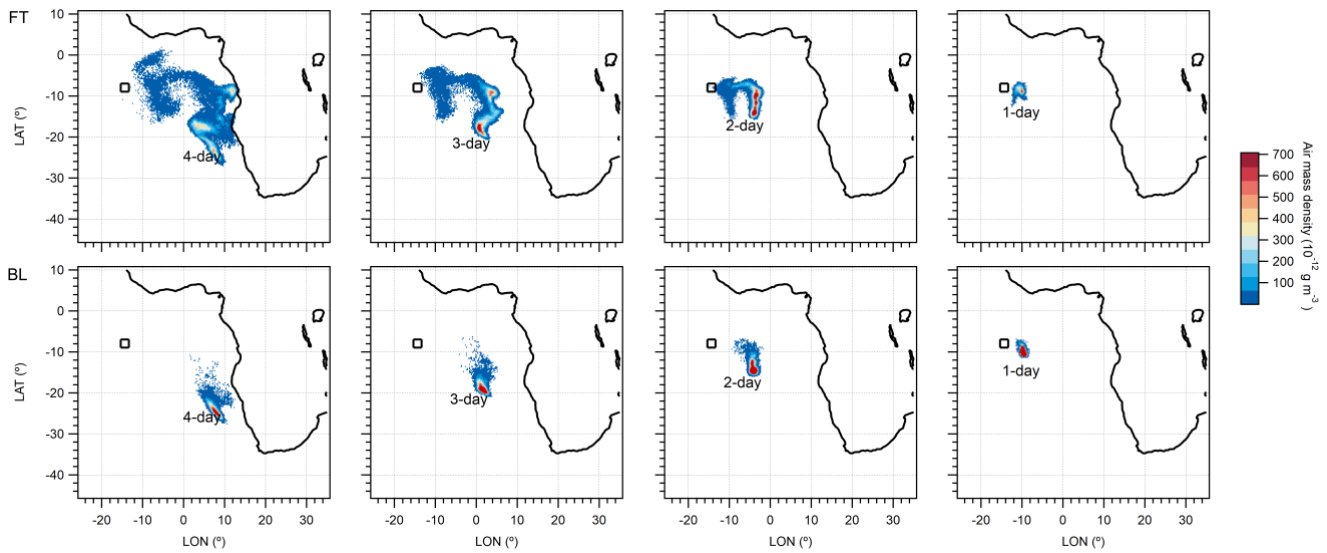

40

**Figure S4:** The instantaneous horizontal air parcel fields at each mid-day during 4 days prior to the NAME start time (air mass arrival at Ascension Island) for Case 1 (released on 18 August 2017 at 12:00 UTC). Top panels represent air parcel dispersion results attributed to the FT; bottom panels represent air parcel dispersion results attributed to the BL. From the left to right, the panels indicate the movement of air parcels before arrival at the release location around the Ascension Island area (black box). All plots are shown in the same color scale.

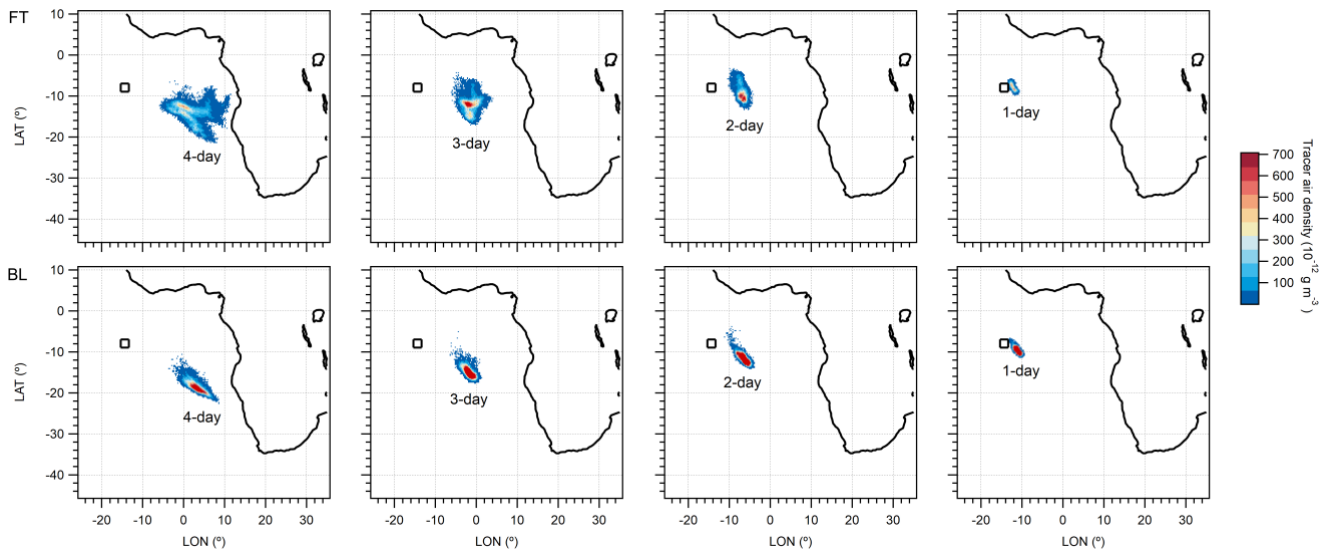

45

**Figure S5:** The instantaneous horizontal air parcel fields at each mid-day during 4 days prior to the NAME start time (arrival time at Ascension Island) for Case 3 (released on 26 August 2017 at 12:00 UTC). Top panels represent air parcel dispersion results attributed to the FT; bottom panels represent air parcel dispersion results attributed to the BL. From the left to right, the panels indicate the movement of air parcels before arrival at the release location around the Ascension Island area (black box). All plots are shown in the same color scale.

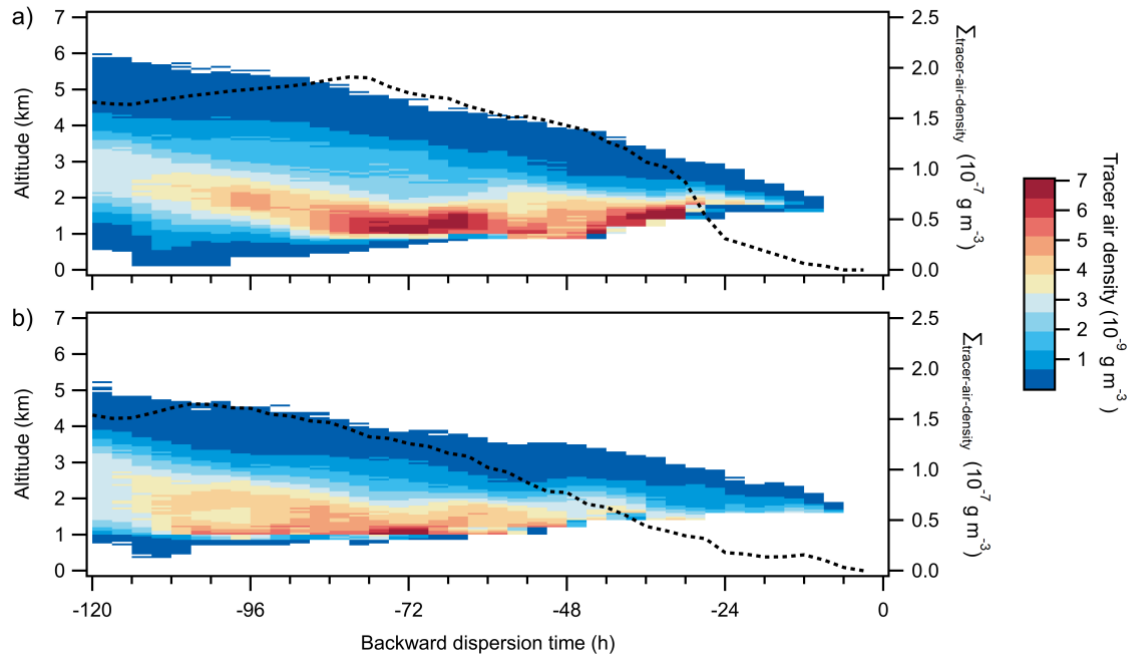

50

**Figure S6: a-b) The 3-hourly time series of the vertical distribution of air parcels dispersed into the FT region identified in the horizontal area of  $20^{\circ}\text{S} - 0^{\circ}\text{N}$ ,  $15^{\circ}\text{W} - 12^{\circ}\text{E}$  (see red box in Fig. 6), in terms of backward dispersion time from 3 to 120 h. The right axis (dashed black lines) is the corresponding cumulative exchange amounts of air parcels dispersed between the FT and MBL along backward simulations. a) is for Case 1 and b) is for Case 3.**

55

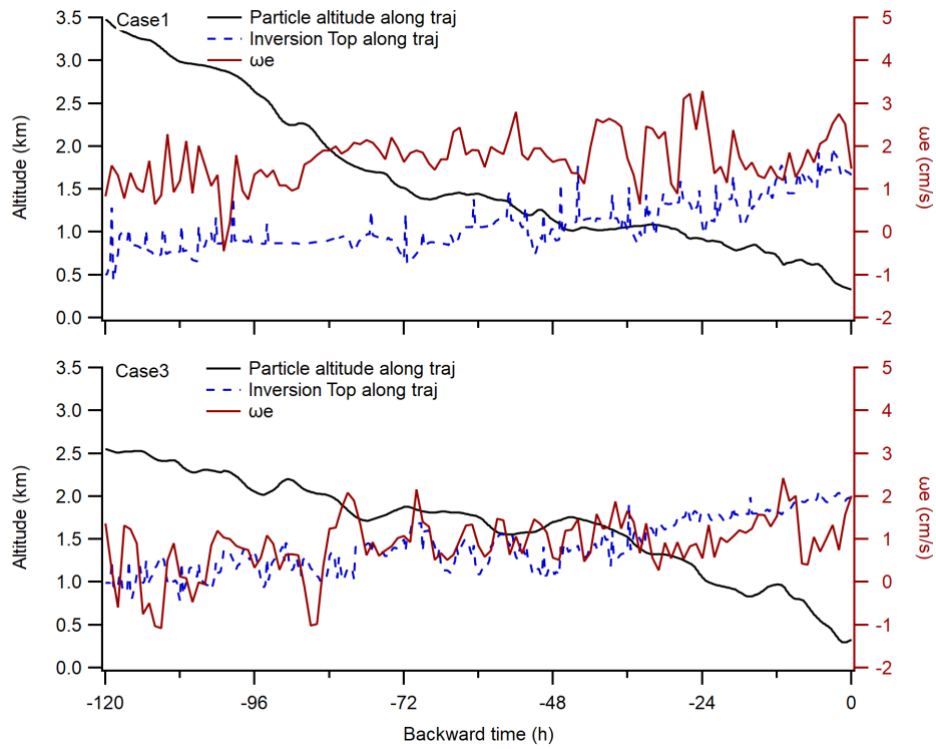

**Figure S7: The entrainment rate (red solid lines) at the BL top along back trajectories from a) Case 1 and b) Case 3, as well as the air parcel altitude (black solid lines) and inversion top height (dashed blue lines) along the back trajectory.**

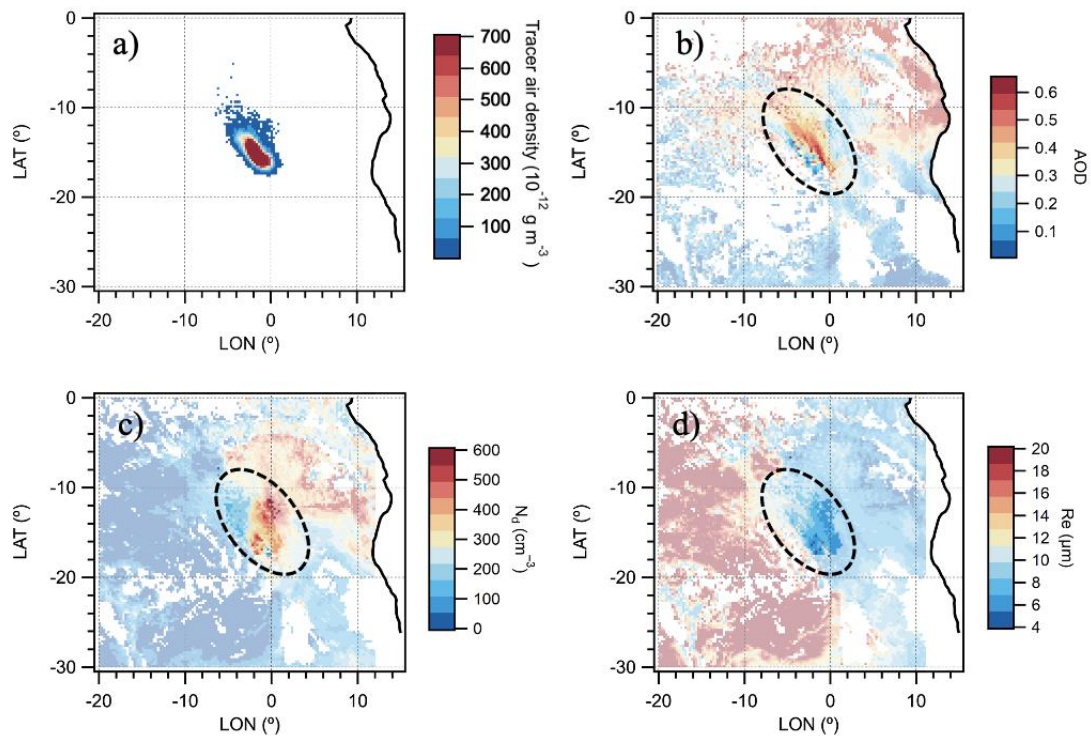

60

**Figure S8: Examples of the co-location relationship between NAME instantaneous horizontal footprints and SEVIRI-retrieved aerosol and cloud fields. a) is an example BL instantaneous horizontal footprint from NAME simulations. b-d) are the example SEVIRI-retrieved AOD,  $N_d$  and  $R_e$  at the time of the example BL horizontal footprint. The parts of the scene (b-d) that are co-located with the contemporaneous horizontal footprints are highlighted. The air-density-weighted average SEVIRI-retrievals were calculated for these co-located areas at 3-hourly backward step.**

65



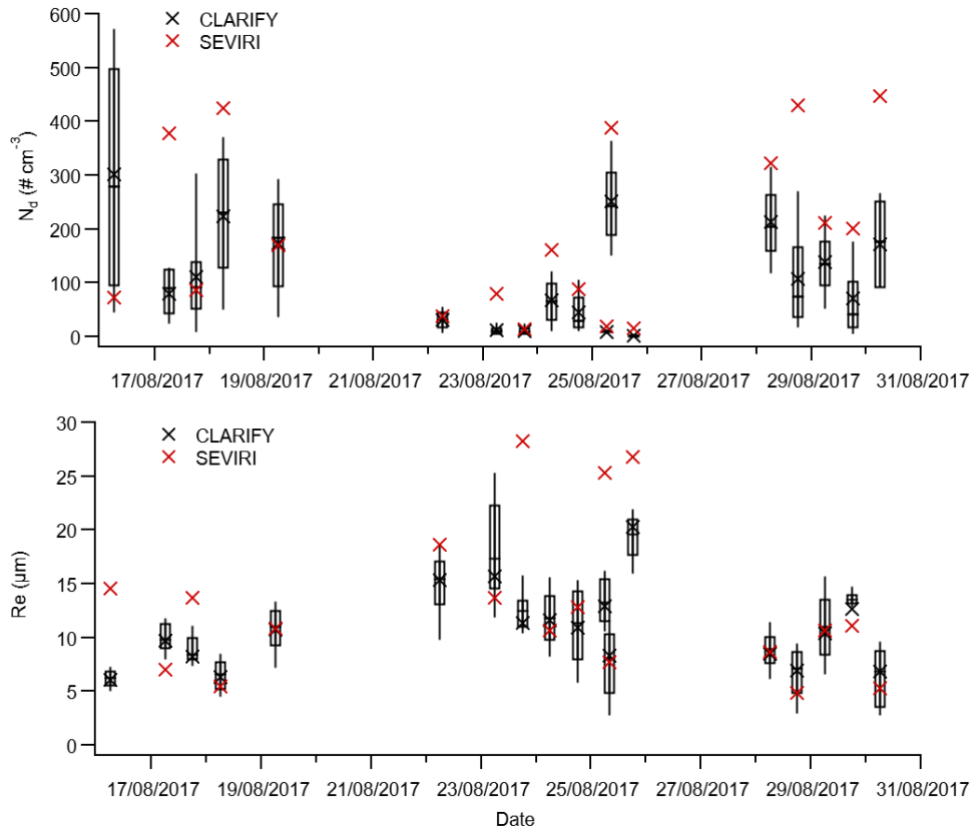

**Figure S9:** The comparison between averaged SEVIRI-retrieved  $N_d$  and  $R_e$  along CLARIFY flight tracks and the top-layer (highest 50 m layer)  $N_d$  and  $R_e$  calculated from CDP measurements during CLARIFY, the boxes and whiskers represent 10, 25, 50, 75 and 90 percentile, the markers represent average values.

70
